# Supplementary material for: A Membrane Potential- and Calpain-Dependent Reversal of Caspase-1 Inhibition Regulates Canonical NLRP3 Inflammasome
Source: PubMed Central journal article supplement — Cell Rep. Author manuscript; Available in PMC 2018 Oct 25. (PMC6201321; doi:10.1016/j.celrep.2018.07.098), 2018-08-28
Supplement: NIHMS1506244-supplement-1.pdf [file NIHMS1506244-supplement-1.pdf]

**Cell Reports, Volume 24**

**Supplemental Information**

**A Membrane Potential- and Calpain-Dependent**

**Reversal of Caspase-1 Inhibition Regulates**

**Canonical NLRP3 Inflammasome**

**Yifei Zhang, Hua Rong, Fang-Xiong Zhang, Kun Wu, Libing Mu, Junchen Meng, Bailong Xiao, Gerald W. Zamponi, and Yan Shi**

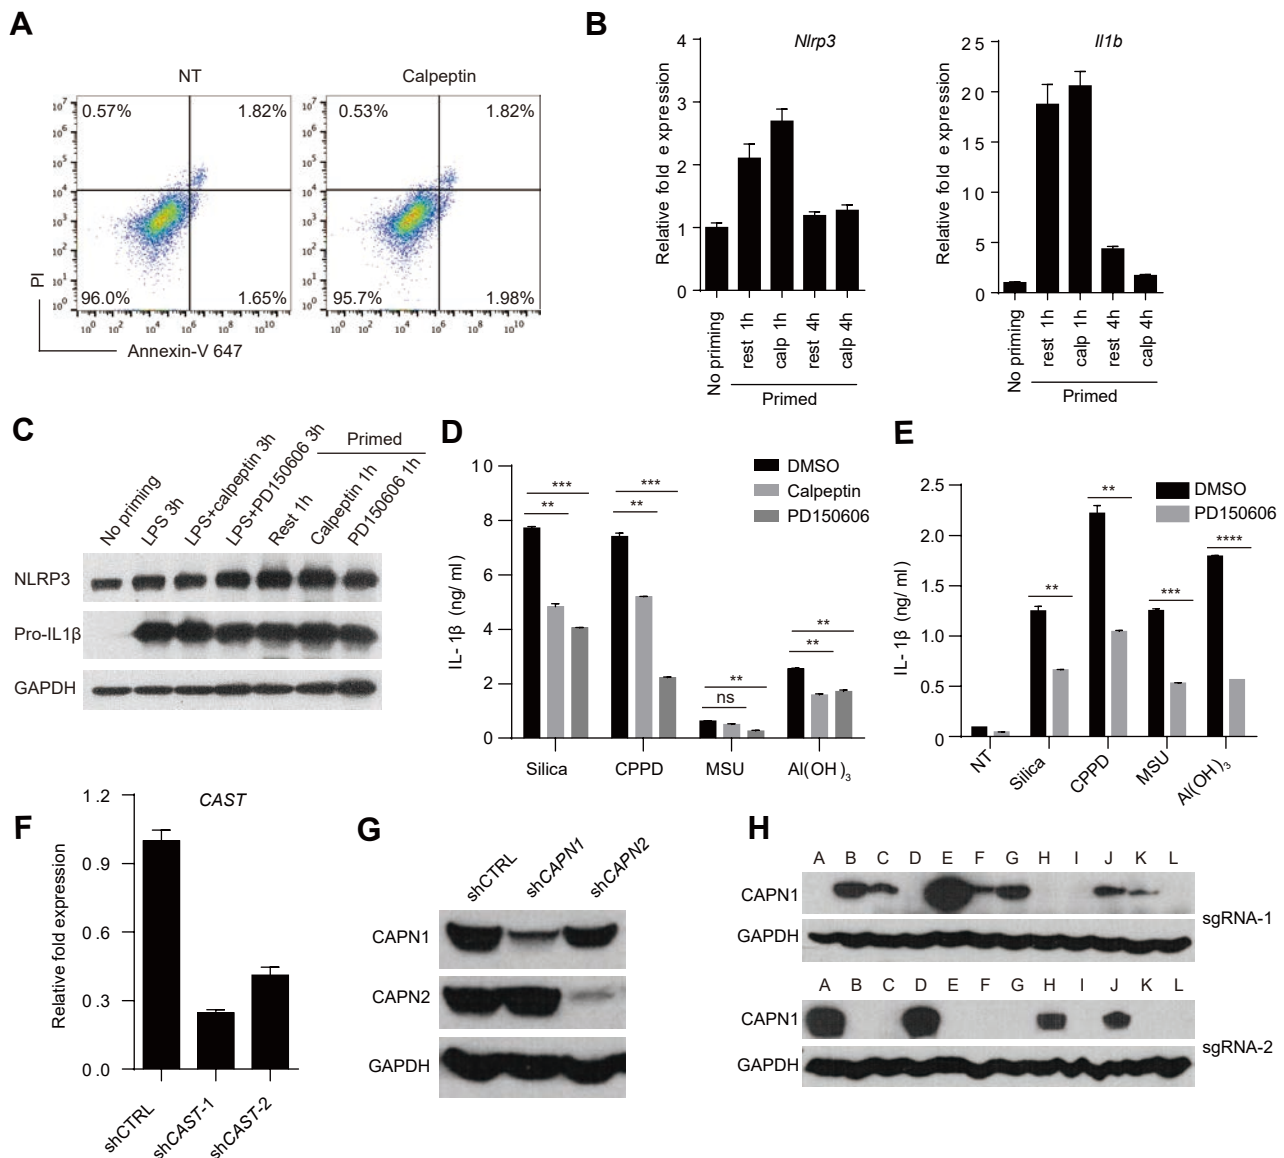

**Figure S1. Calpain inhibition impairs NLRP3 inflammasome without affecting cell viability or the priming step, related to Figure 1.**

(A) Flow cytometric analysis of Annexin V and PI staining in BMDCs treated with calpeptin for 6 hrs. (B) BMDCs were primed with LPS for 3 hrs and changed to fresh medium with or without calpeptin (calp) for another 1 or 4 hrs. cDNA was extracted for q-PCR analysis of NLRP3 and pro-IL-1 $\beta$  mRNA fold changes. (C) Calpain inhibitors were added together with LPS or after LPS priming in BMDCs. Cell lysates were subjected to WB. (D, E) ELISA analysis of IL-1 $\beta$  production in BMDMs (D) and THP-1 cells (E) treated with different crystals in the presence or absence of calpeptin or PD150606. (F) qPCR analysis of calpastatin (CAST) mRNA fold expression in CAST knockdown or non-targeting shRNA-treated control THP-1 cells. (G) CAPN1 and CAPN2 shRNA knockdown efficiency in THP-1 was confirmed by western blot. (H) CAPN1-deficient THP-1 clones generated with 2 different small guide RNA (sgRNA) by CRISPR-Cas9 were identified by Western blot. Data represents at least 2 independent experiments (A-E).



**A**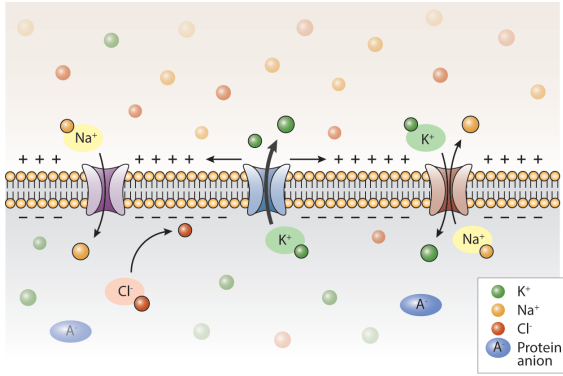**B**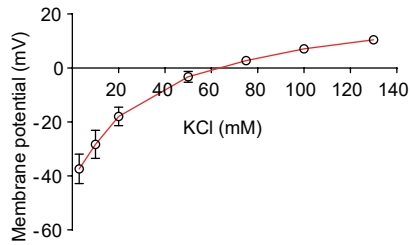**D**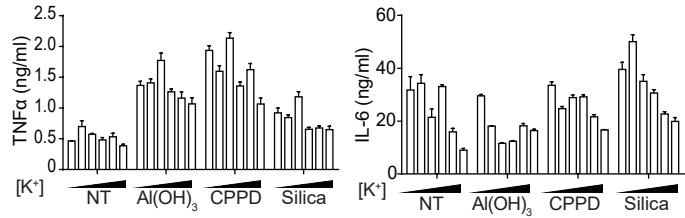**C**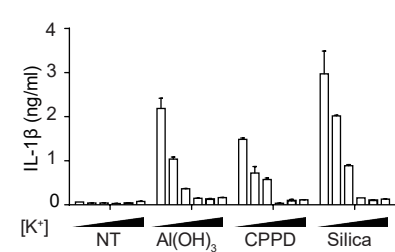**E**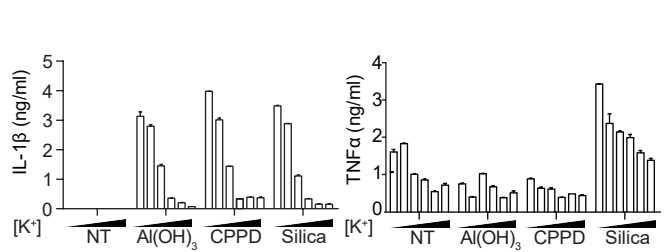**F**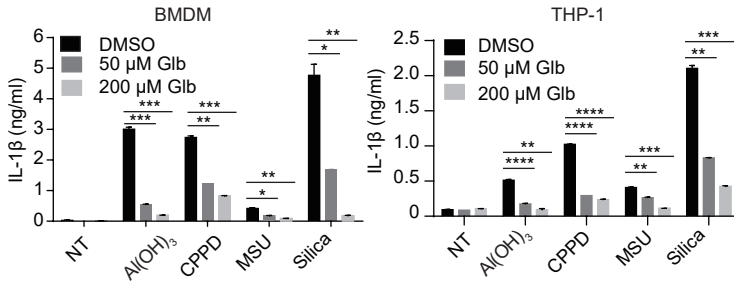**G**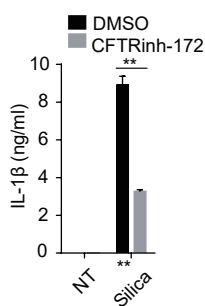**H**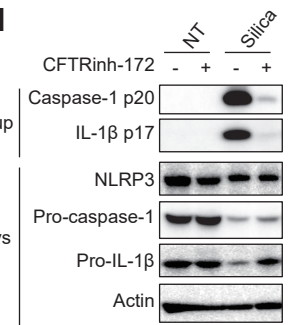**I**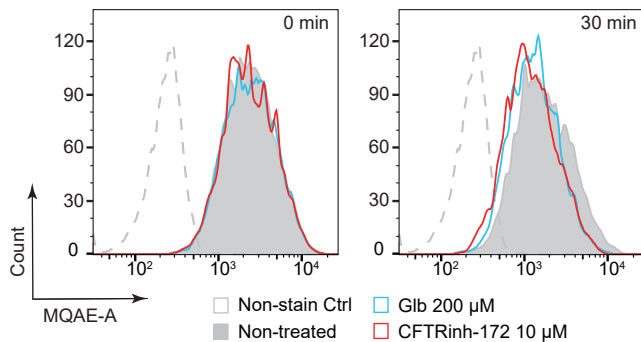**J**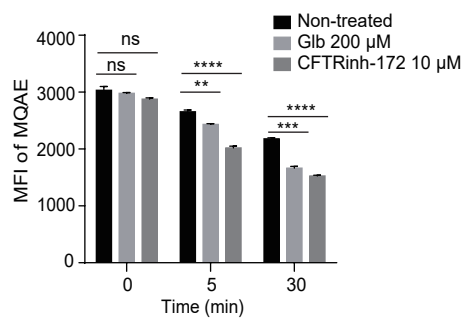**K**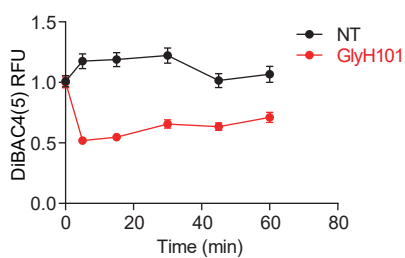**L**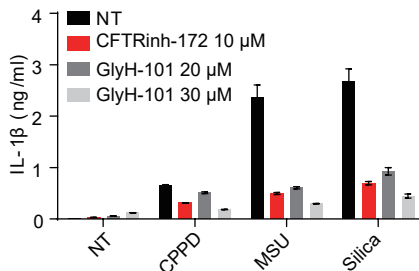**M**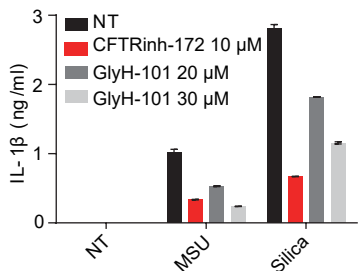

**Figure S2. Depolarization or hyperpolarization of membrane potential impairs IL-1 $\beta$  production but not dramatically affect caspase-1 independent cytokine secretion, related to Figure 2.**

(A) According to the Goldman-Hodgkin-Katz Equation, K<sup>+</sup>, Na<sup>+</sup>, and Cl<sup>-</sup> are the main contributors to the membrane potential. The MP depends on not only the concentration gradients of those ions, but also their relative membrane permeability. In the resting state, the outward movement of K<sup>+</sup> driven by chemical diffusion sets up a positive charge at the external membrane interface. This is countered by the accumulation of Cl<sup>-</sup> near the inner leaflet interface. This creates the resting MP for all eukaryotic cells. In a typical experimental setting, increased extracellular K<sup>+</sup> concentrations with reciprocal reduction of Na<sup>+</sup> to keep osmolarity constant results in MP depolarization because in most cells the resting p K (permeability of K<sup>+</sup>) is larger than p Na or p Cl. On the other hand, inhibition of chloride ion channels by glyburide or CFTRinh-172, will cause Cl<sup>-</sup> accumulation inside the cell and MP hyperpolarization. (B) BMDCs MP in response to different K<sup>+</sup> concentrations (n=6). (C, D) BMDCs were treated with different crystals in different concentrations of extracellular K<sup>+</sup> (5, 10, 20, 50, 75 and 100 mM, left to right). IL-1 $\beta$  (C), TNF $\alpha$  and IL-6 (D) in supernatants were measured by ELISA after 5 hrs (n=3). (E) ELISA analysis for IL-1 $\beta$  and TNF $\alpha$  secretion in BMDMs treated with different crystals in different concentrations of K<sup>+</sup> (5, 10, 20, 50, 75 and 100 mM, left to right). (F) ELISA analysis of IL-1 $\beta$  secreted by BMDMs or THP-1 stimulated with different crystals in the presence or absence of glyburide (Glb). (G) Elisa analysis of IL-1 $\beta$  production in BMDMs treated with different crystals in the presence or absence of CFTRinh-172. (H) Immunoblot of activated Caspase-1 and mature IL-1 $\beta$  in supernatants (Sup) and all NLRP3 inflammasome components in cell lysates (Lys) of BMDMs. (I, J) Intracellular chloride ion concentration changes in response to glyburide and CFTRinh-172 were measured by MAQE staining on flow cytometer. The fluorescent intensity of MQAE decreases in proportion to the chloride increase in cells (n=3). (K) Changes of MP of THP-1 cells under GlyH-101 treatment or DMSO control were measured by DiBAC4(5) staining. Each point was mean  $\pm$  SEM of cells from at least 12 fields in 2 independent experiments. (L and M) ELISA analysis of IL-1 $\beta$  in supernatants from THP-1 cells (L) or BMDMs (M) stimulated with different crystals in the presence or absence of CFTRinh-172 or GlyH-101. Results are representative of at least of three independent experiments (C-G, J, L and M, mean  $\pm$  SEM, n=3).

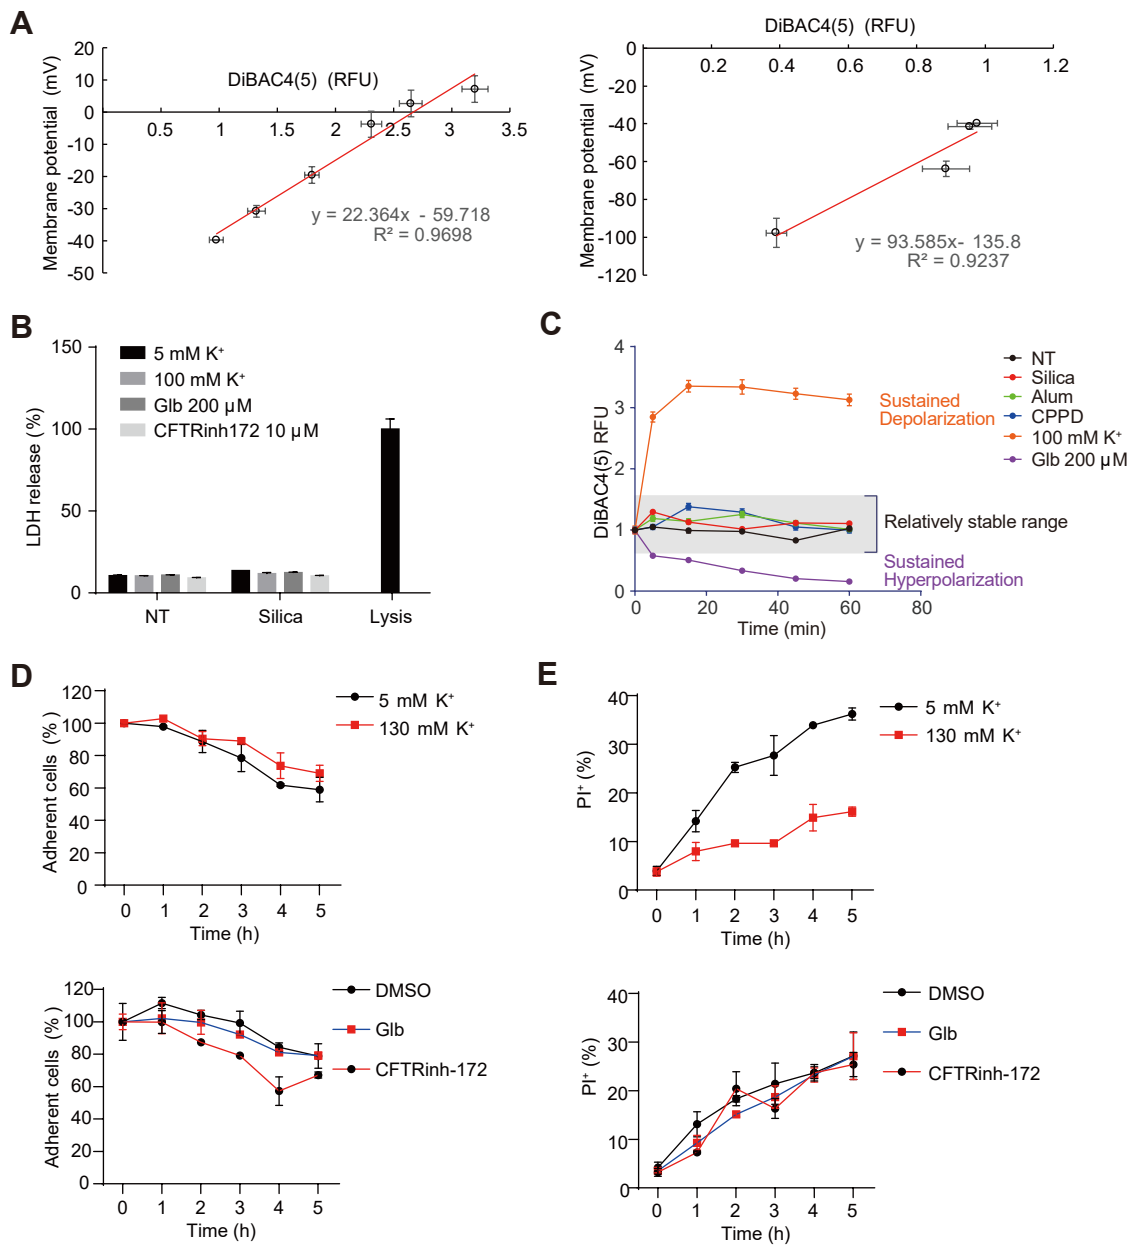

**Figure S3. The MP is maintained close to the resting value for NLRP3 inflammasome activation, related to Figure 3.**

(A) DiBAC4(5) staining intensity in THP-1 macrophages was calibrated to MP based on the patch clamping data under different concentrations of extracellular K<sup>+</sup> (left) or glyburide (right). (B) THP-1 cells treated as indicated for 1h and cell death was measured by LDH cytotoxicity detection kit (n=3). (C) DiBAC4(5) RFU Changes over time in THP-1 macrophages under different stimuli was measured by DiBAC4(5) staining. Results are pool of 3 independent experiments. (D, E) THP-1 cells were treated with silica under indicated conditions for different times and then were washed as we did for the K<sup>+</sup> content measurement assay. Remaining adherent cell numbers (D) were counted by Flow cytometric analysis and cell death (E) was analyzed by propidium iodine (PI) staining (n=3). Data are shown as mean ± SEM and are representative of two independent experiments (D, E).

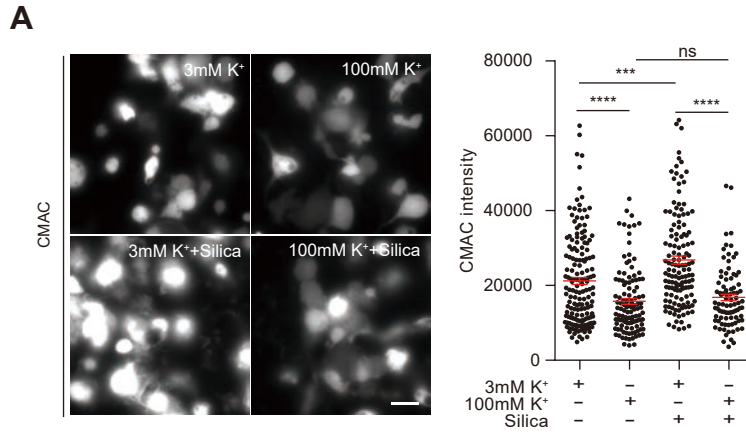

**Figure S4. Disruption of membrane potential causes calpain activity attenuation in BMDCs, related to Figure 4.** (A) Calpain activity in BMDCs treated with indicated stimuli were measured by CMAC. Scale bar is 20  $\mu$ m. Right panels: plots of intensities of CMAC fluorescence in individual cells. ns, not significant. \*\*\*  $p < 0.001$ , \*\*\*\*  $p < 0.0001$ . Data are representative of two independent experiments.

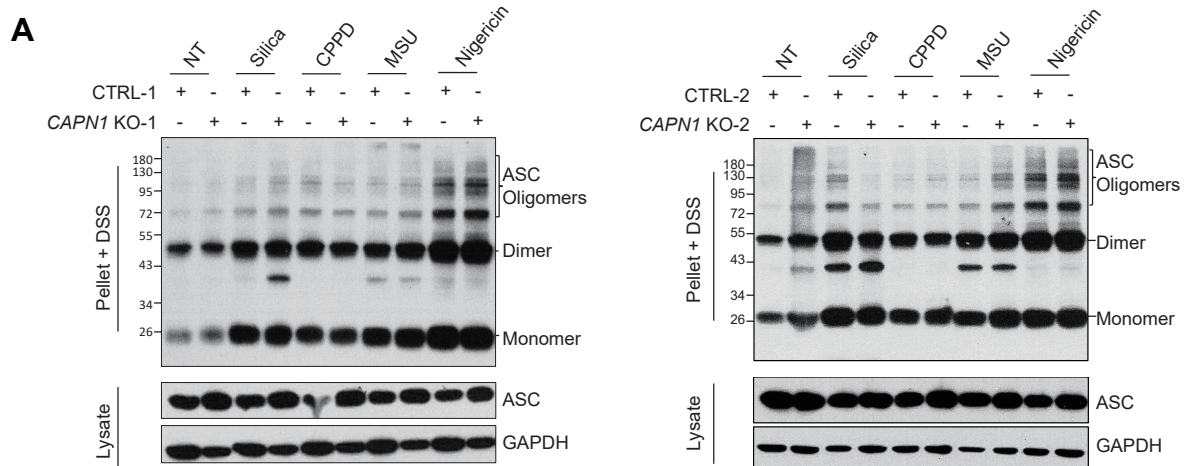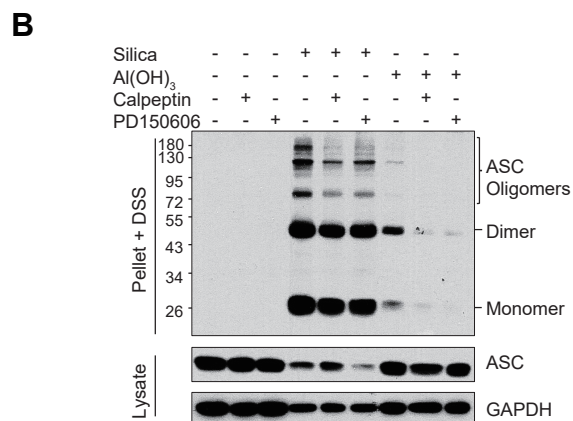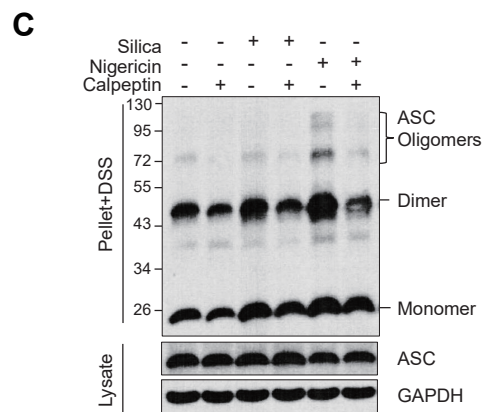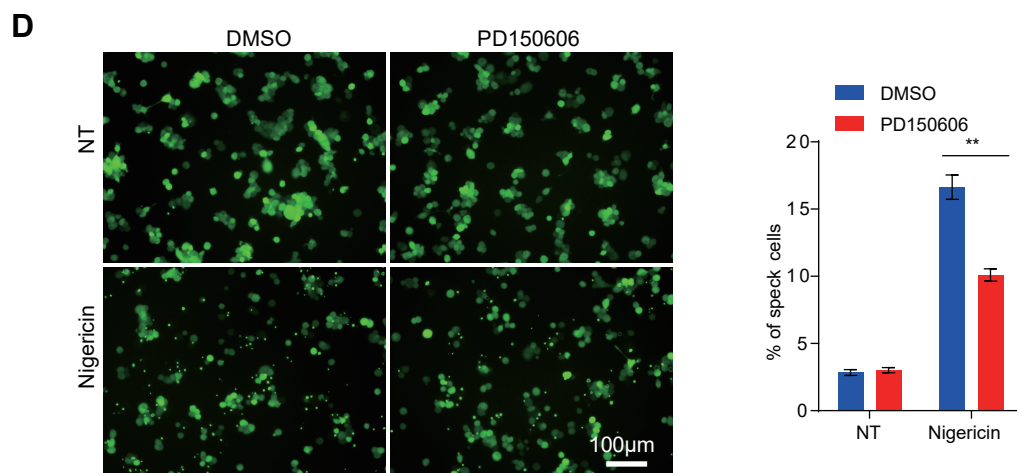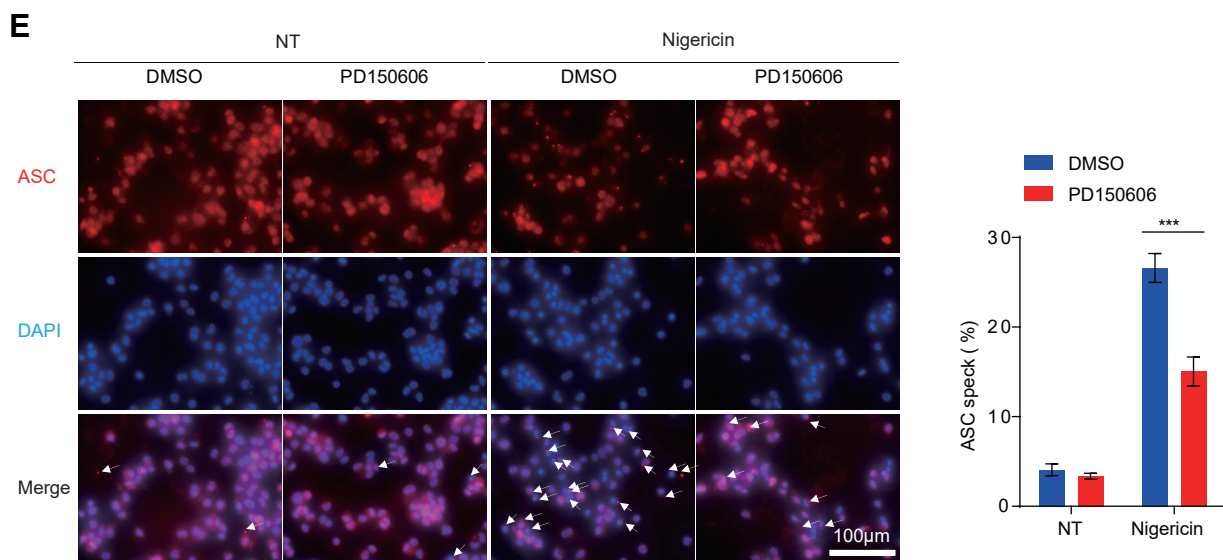

**Figure S5.  $\mu$ -calpain regulates signals downstream of ASC oligomerization while other calpain species regulate upstream signals, related to Figure 6.**

(A-C) Two CAPN1 knockout THP-1 cells lines (A), BMDMs (B) or THP-1 cells (C) were treated as indicated. The triton X-100 insoluble pellets were cross-linked with DSS, and analyzed by ASC immunoblotting. Data are representative at least 2 independent experiments. (D) Representative images and quantification of ASC speck formation upon NLRP3 stimulation in EGFP-ASC THP-1 macrophages. (E) Endogenous ASC was stained by immunofluorescence in THP-1 macrophages. Representative images and quantification of ASC speck formation were shown. For (D) and (E), more than 6 random images from 3 independent experiments were analyzed. Bar, 100  $\mu$ m.



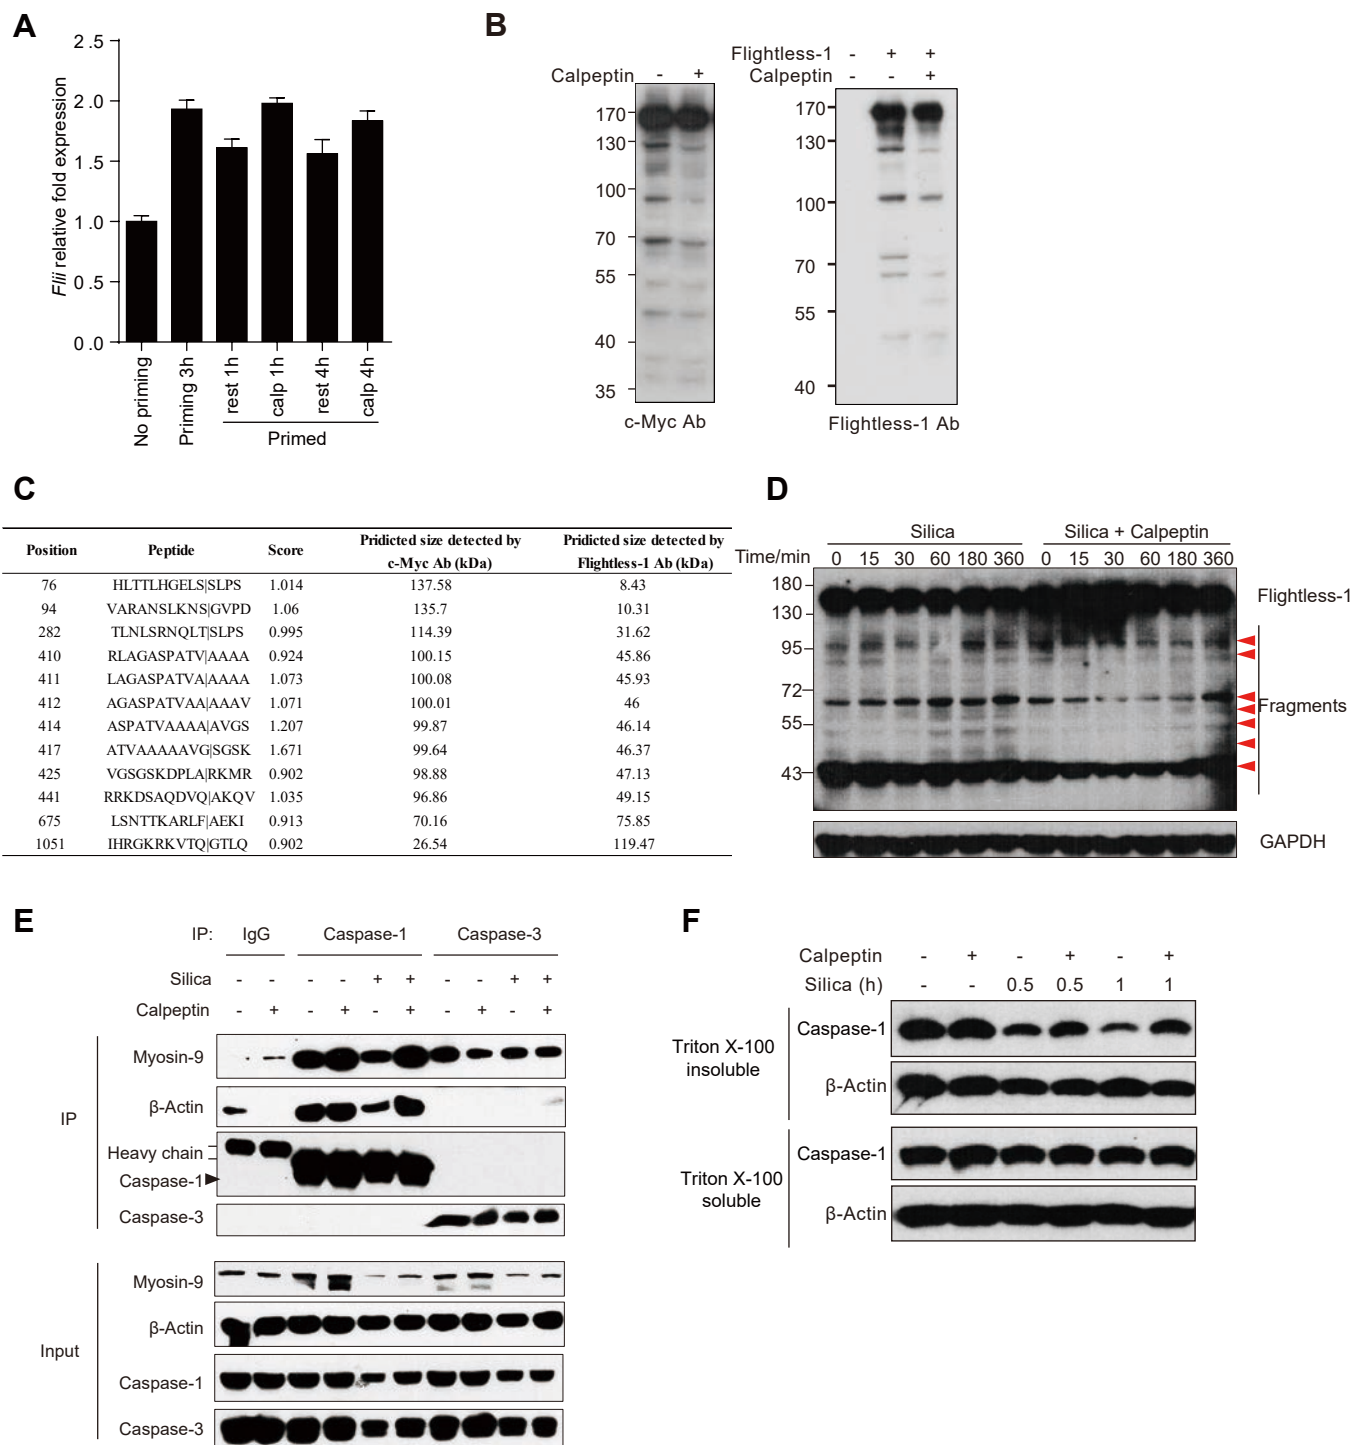

**Figure S6. Removal of Caspase-1 inhibition by flightless-1 and actin sequestration requires  $Ca^{2+}$  activated calpain, related to Figure 6.**

(A) LPS-primed BMDCs were treated with calpeptin for 1 or 4 hrs. Flightless -1 mRNA fold change was analyzed by q-PCR. (B) C-terminal myc-tagged Flightless-1 was transfected in 293FT cells and calpeptin was added 8 hrs after the transfection. At 24 hrs, Triton X-100-insoluble fraction proteins were extracted for Western blot with Flightless-1 antibody (recognize N-terminal 300aa) or c-myc antibody. (C) 52 calpain cut sites on mouse Flightless-1 are predicted by GPS-CCD 1.0 when the threshold was set at high level (cutoff 0.654). Shown are partial examples of predicted calpain cleavage sites (score>0.902) and their corresponding sizes detected by c-terminal myc or Flightless-1 antibody. (D) WB analysis of Flightless-1 in BMDCs treated with silica. (E) BMDMs were treated with silica in the presence or absence of calpeptin for 1h and lysates were immunoprecipitated with anti-Caspase-1 or anti-Caspase-3 antibodies, and detected by myosin-9 and  $\beta$  actin antibodies. (F) BMDMs were treated as indicated and then lysed in Triton buffer. Bundled F-actin pool (triton X-100 insoluble) were enriched in low-speed pellet and subjected to immunoblotting. Data are representative of 2 or 3 independent experiments.

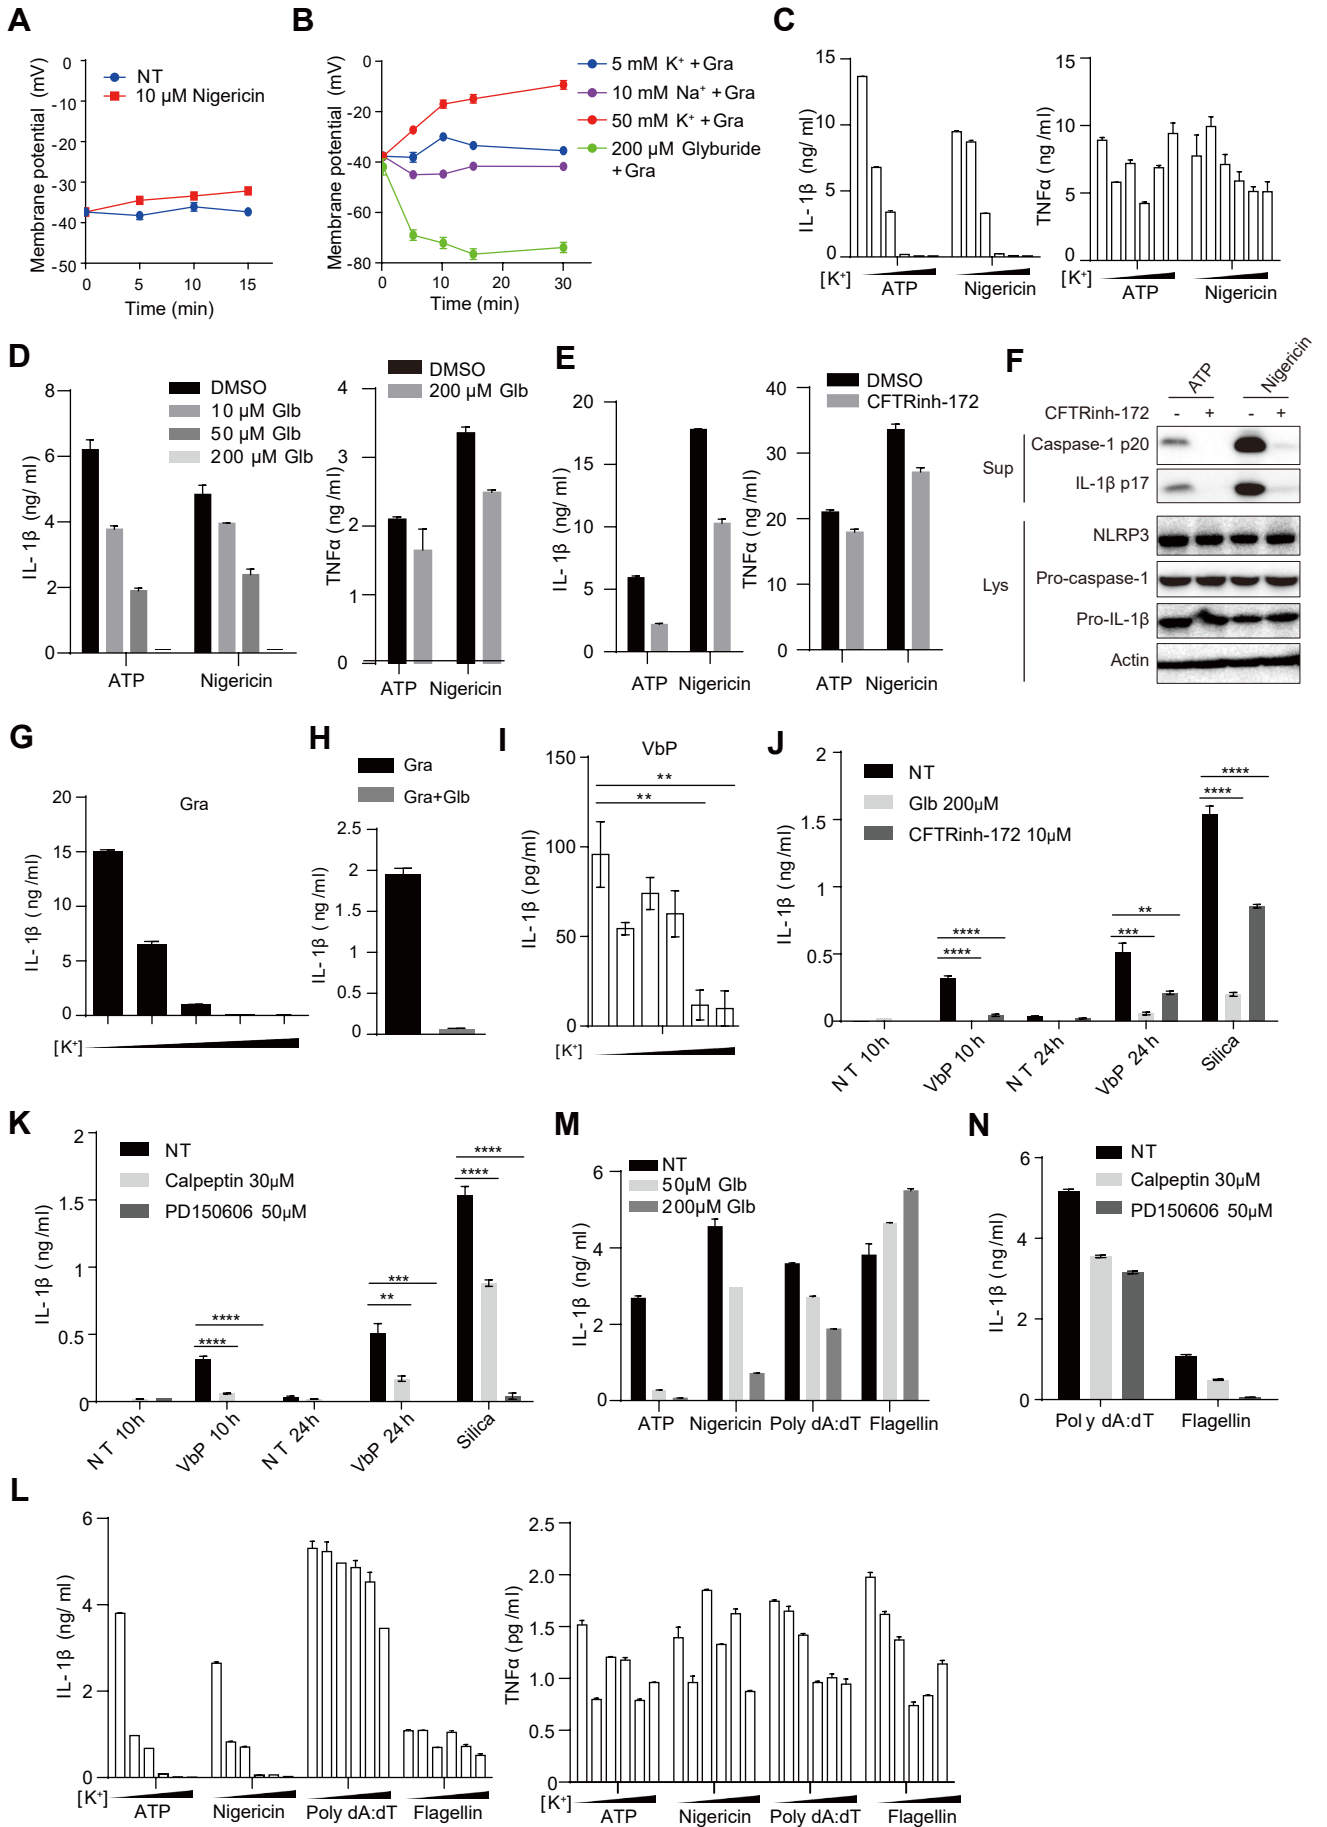



**Figure S7. The near resting state MP contributes to non-crystal induced NLRP3 activation and non-NLRP3 inflammasome activation, related to Figure 2 and Figure 3.**

(A) MP changes under nigericin treatment in THP-1 cells were measured by DiBAC4(5) staining. (B) THP-1 cells were treated with gramicidin (Gra) in normal medium (5 mM K<sup>+</sup>), low Na<sup>+</sup> medium (10 mM Na<sup>+</sup>) in which Na<sup>+</sup> was substituted by the membrane impermeable cation choline, 50 mM K<sup>+</sup> medium or glyburide medium, and MP changes were detected by DiBAC4(5) staining. (C-E) BMDMs were pretreated with increasing concentrations of extracellular K<sup>+</sup> (5, 10, 20, 50, 75 and 100 mM) (C), glyburide (D) or 10 μM CFTRinh-172 (E), and then treated with ATP or nigericin for 1 hr. IL-1β and TNFα production were measured by ELISA. (F) Immunoblot of activated Caspase-1 and mature IL-1β in supernatants and all NLRP3 inflammasome components in cell lysates of BMDMs. (G, H) THP-1 macrophages were pretreated with increasing concentrations of extracellular K<sup>+</sup> (5, 20, 40, 75 and 100 mM) (G) or 200 μM glyburide (H) and then treated with gramicidin for 1 hr. IL-1β production was measured by ELISA. (I-K) BMDMs were pretreated with increasing levels of extracellular K<sup>+</sup> (5, 10, 20, 50, 75 and 100 mM, left to right) (I), glyburide or CFTRinh-172 (J), Calpeptin or PD150606 (K), and then treated with 20 μM Val-boroPro (VbP) for 10 hrs or 24 hrs. IL-1β releasing was measured by ELISA. (L-N) BMDMs were pretreated with increasing levels of extracellular K<sup>+</sup> (5, 10, 20, 50, 75 and 100 mM, left to right) (L), glyburide (M), Calpeptin or PD150606 (N), and then treated with ATP, nigericin or transfected with poly dA:dT or flagellin. IL-1β and TNFα releasing was measured by ELISA. Data are shown as mean ± SEM and represents at least 2 independent experiments.

**Table S1. MS identified Caspase-1 binding proteins with large difference in MS hit numbers between Silica 1h and Silica 1h+Calpeptin treatments, related to Figure 6.**

| #  | Identified Proteins                                   | Molecular Weight | Total Spectrum Count |                      | Function                                                                                                       |
|----|-------------------------------------------------------|------------------|----------------------|----------------------|----------------------------------------------------------------------------------------------------------------|
|    |                                                       |                  | Silica 1h            | Silica 1h +calpeptin |                                                                                                                |
| 1* | myosin-9                                              | 226 kDa          | 8                    | 52                   | Cytoskeleton reorganization, focal contacts formation                                                          |
| 2* | actin, cytoplasmic 1                                  | 42 kDa           | 9                    | 38                   | Actin cytoskeleton                                                                                             |
| 3  | vimentin                                              | 54 kDa           | 3                    | 34                   | Type III intermediate filament                                                                                 |
| 4  | unconventional myosin-If                              | 125 kDa          | 0                    | 18                   | Actin-based motor molecules                                                                                    |
| 5  | plectin isoform 12alpha                               | 534 kDa          | 0                    | 16                   | Organizers of intermediate filament cytoarchitecture. Harbors a functional actin-binding domain.               |
| 6  | ras GTPase-activating-like protein IQGAP1             | 189 kDa          | 0                    | 15                   | Reorganization of the actin cytoskeleton at the plasma membrane.                                               |
| 7  | galectin-3                                            | 27 kDa           | 8                    | 14                   | $\beta$ -galactoside-binding protein. Plays an important role in cell-cell adhesion, cell-matrix interactions. |
| 8  | desmoplakin                                           | 333 kDa          | 2                    | 11                   | Maintain the structural integrity at adjacent cell contacts.                                                   |
| 9  | unconventional myosin-Ie                              | 127 kDa          | 0                    | 10                   | Actin-based motor molecules                                                                                    |
| 10 | annexin A7                                            | 50 kDa           | 6                    | 10                   | Calcium-dependent phospholipid binding protein                                                                 |
| 11 | unconventional myosin-Ig                              | 119 kDa          | 0                    | 9                    | Actin-based motor molecules                                                                                    |
| 12 | junction plakoglobin                                  | 82 kDa           | 4                    | 8                    | The only known constituent common to submembranous plaques of both desmosomes and intermediate junctions.      |
| 13 | unconventional myosin-Ic isoform a                    | 120 kDa          | 0                    | 7                    | Actin-based motor molecules                                                                                    |
| 14 | aminopeptidase N                                      | 110 kDa          | 3                    | 7                    | Digestion of peptides generated from hydrolysis of proteins by gastric and pancreatic proteases                |
| 15 | actin-related protein 3                               | 47 kDa           | 1                    | 6                    | Functions as ATP-binding component of the Arp2/3 complex                                                       |
| 16 | EF-hand domain-containing protein D2                  | 27 kDa           | 0                    | 5                    | Negative regulator of the canonical NF-kappa-B-activating branch.                                              |
| 17 | F-actin-capping protein subunit beta isoform d, CAPZB | 29 kDa           | 0                    | 5                    | Cytoskeletal organization                                                                                      |
| 18 | elongation factor 1-alpha 1, eEF1A1                   | 50 kDa           | 0                    | 5                    | Protein biosynthesis. Interact with cytoskeleton.                                                              |
| 19 | flightless-1                                          | 145 kDa          | 0                    | 5                    | Coactivator in transcriptional activation. Cytoskeletal rearrangement.                                         |

| Continue |                                                      |         |   |   |                                                                                                                    |
|----------|------------------------------------------------------|---------|---|---|--------------------------------------------------------------------------------------------------------------------|
| 20       | coronin-1C                                           | 53 kDa  | 0 | 5 | Contain actin binding domain and may be involved in cytokinesis, motility and signal transduction.                 |
| 21       | unconventional myosin-XVIIIa                         | 231 kDa | 0 | 4 | Actin-based motor molecules                                                                                        |
| 22       | 78 kDa glucose-regulated protein precursor           | 72 kDa  | 0 | 3 | Involved in the correct folding of proteins.                                                                       |
| 23       | annexin A11                                          | 54 kDa  | 0 | 2 | Involved in midbody formation and cytokinesis.                                                                     |
| 24       | gelsolin                                             | 86 kDa  | 0 | 2 | A key regulator of actin filament assembly and disassembly.                                                        |
| 25       | heat shock cognate 71 kDa protein                    | 71 kDa  | 0 | 2 | A repressor of transcriptional activation. Component of the PRP19-CDC5L splicing complex.                          |
| 26       | E3 ubiquitin-protein ligase TRIM21                   | 53 kDa  | 0 | 2 | Regulate ubiquitination and cell cycle progression.                                                                |
| 27       | filamin-A                                            | 280 kDa | 0 | 2 | Actin binding protein. Regulates reorganization of the actin cytoskeleton .                                        |
| 28       | prelamin-A/C                                         | 65 kDa  | 0 | 2 | Nuclear assembly and chromatin organization.                                                                       |
| 29       | actin-related protein 2/3 complex subunit 1B, ARPC1B | 41 kDa  | 0 | 2 | A subunit of the Arp2/3 protein complex that plays a major role in the regulation of the actin cytoskeleton.       |
| 30       | alpha-actinin-4                                      | 105 kDa | 0 | 2 | F-actin cross-linking protein                                                                                      |
| 31       | transitional endoplasmic reticulum ATPase            | 89 kDa  | 0 | 2 | Involved in the formation of the transitional endoplasmic reticulum.                                               |
| 32       | lysosome-associated membrane glycoprotein 2          | 46 kDa  | 0 | 2 | Protect the lysosomal membrane.                                                                                    |
| 33       | Predicted: biliverdin reductase A isoform X3         | 23 kDa  | 0 | 2 | A scaffold and intracellular transporter of kinases that regulate growth and proliferation of cells.               |
| 34       | peroxiredoxin-1                                      | 22 kDa  | 0 | 2 | Antioxidant enzyme                                                                                                 |
| 35       | 14-3-3 protein zeta/delta                            | 28 kDa  | 0 | 2 | Bind and modulate a large number of partners, usually by recognition of a phosphoserine or phosphothreonine motif. |

\* Main visible bands are cut off from Coomassie blue gel.
